# Supplementary material for: Bridging the Generational Digital Divide in the Healthcare Environment
Source: MDPI journal article supplement (doi:10.3390/jpm12081214), 2022-07-26
Supplement: s1 [file s1]

AGE:

GENDER: M ☐ F ☐

|                                                                        |                                             |    |
|------------------------------------------------------------------------|---------------------------------------------|----|
| Study level                                                            | <input type="checkbox"/> Read and write     |    |
|                                                                        | <input type="checkbox"/> Primary            |    |
|                                                                        | <input type="checkbox"/> Secondary          |    |
|                                                                        | <input type="checkbox"/> University         |    |
| How do you request an appointment at the health center?                | <input type="checkbox"/> In person          |    |
|                                                                        | <input type="checkbox"/> By phone           |    |
|                                                                        | <input type="checkbox"/> By internet or App |    |
| Do you use internet?                                                   | Yes                                         | No |
| Are you able to make an appointment without help at the health center? | Yes                                         | No |
| To make an appointment, were you helped by the pharmacy?               | Yes                                         | No |
| <b>When a new treatment is prescribed...</b>                           |                                             |    |
| Do you understand your physician's explanation?                        | Yes                                         | No |
| Do you search on internet for information about it?                    | Yes                                         | No |
| Do you ask your pharmacist for information about it?                   | Yes                                         | No |
